# Supplementary material
Source: PubMed Central journal article supplement (PMC5656247)
Supplement: NIHMS839798-supplement-309819R2_Acknow.pdf [file NIHMS839798-supplement-309819R2_Acknow.pdf]

## Circulation Research

---

**From:** Margitich, Irene S. <imargiti@med.miami.edu>  
**Sent:** Tuesday, December 13, 2016 1:26 PM  
**To:** circulation.research@circresearch.com  
**Cc:** Balkan, Wayne E, Ph.D.; Kanelidis, Anthony J  
**Subject:** CIRCRES/2016/309819R1 - acknowledgement

Dear Editor,

I acknowledge that I have been named and thanked for “critical editing of the manuscript” CIRCRES/2016/309819R1: *Route of Delivery Modulates the Efficacy of Mesenchymal Stem Cell Therapy for Myocardial Infarction: A Meta-Analysis of Preclinical Studies and Clinical Trials.*

Thank you for your assistance.

***Irene S. Margitich***

*Senior Manager, Research Support  
Interdisciplinary Stem Cell Institute  
University of Miami Miller School of Medicine  
1501 NW 10<sup>th</sup> AVE BRB 832  
Office: 305-243-5415  
[imargitich@miami.edu](mailto:imargitich@miami.edu)*

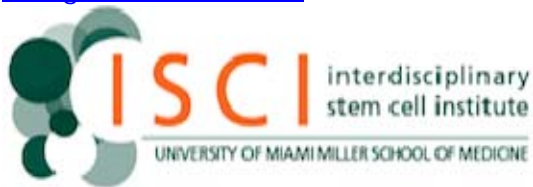

Regarding manuscript as below

*CIRCRES/2016/309819R1: Route of Delivery Modulates the Efficacy of Mesenchymal Stem Cell Therapy for Myocardial Infarction: A Meta-Analysis of Preclinical Studies and Clinical Trials.*
